# Supplementary material for: Atrial Cardiopathy in the Absence of Atrial Fibrillation Increases Risk of Ischemic Stroke, Incident Atrial Fibrillation, and Mortality and Improves Stroke Risk Prediction
Source: PubMed Central journal article supplement — J Am Heart Assoc. 2020 Jun 1;9(11):e013227. doi: 10.1161/JAHA.119.013227 (PMC7428995; doi:10.1161/jaha.119.013227), 2020-06-01
Supplement: JAH3-9-e013227-s001.pdf [file JAH3-9-e013227-s001.pdf]

# **Supplemental Material**

**Table S1. Coding and criteria for outcome assessment.**

| Variable            | Database(s)                      | ICD-10 Code(s) or Algorithm                                                                                                                                                                                                                                                                                                     | Diagnosis Type                                  |
|---------------------|----------------------------------|---------------------------------------------------------------------------------------------------------------------------------------------------------------------------------------------------------------------------------------------------------------------------------------------------------------------------------|-------------------------------------------------|
| Stroke              | CIHI-DAD                         | I60, I61, I64, H341                                                                                                                                                                                                                                                                                                             | Primary or most responsible                     |
| Atrial Fibrillation | CIHI-DAD,<br>NACRS, ODB,<br>OHIP | 1 HOSP admission (ICD-10: I48)<br>OR<br>1 NACRS visit (I-480 )<br>OR<br>1 rhythm control medication<br>(Amiodarone HCL, Fecainde Acetate,<br>Propafenone HCL, Sotalol HCL)<br>OR<br>1 Anticoagulation medication<br>(Warfarin Sodium) + 1 OHIP visit<br>(G45)<br>OR<br>1 Cardioversion procedure (Z437) + 1<br>OHIP visit (G45) | Primary or most responsible<br>(for HOSP codes) |
| Death               | RPDB                             | Date of death                                                                                                                                                                                                                                                                                                                   | N/A                                             |

ICD-10=International Classification of Diseases, Version 10; CIHI-DAD=Canadian Institute for Health Information Discharge Abstract Database; NACRS=National Ambulatory Care Reporting System; ODB=Ontario Drug Benefit Claims database; OHIP=Ontario Health Insurance Plan database; RPDB=Ontario Registered Persons Database

**Table S2. Two and five year absolute person-time incidence rates (per 1000 person years) of ischemic stroke (primary outcome), incident AF and death (secondary outcomes) for those with both moderate-severe LAE and excessive atrial ectopy (EAE) (N=232) compared to normal left atrial diameter and normal ectopic frequency (N=4456); p-value for rate difference.**

| <b>Left Atrial Enlargement and Atrial Ectopy Composite</b> |                  |                     |                |
|------------------------------------------------------------|------------------|---------------------|----------------|
| <b>Outcomes</b>                                            | <b>Normal</b>    | <b>LAE+EAE</b>      | <b>p-value</b> |
| <b>2 YEAR RATE</b>                                         |                  |                     |                |
| <b><i>Ischemic Stroke</i></b>                              |                  |                     |                |
| Rate in 1000 PY (95%CI)                                    | 1.8 (1.1-2.9)    | 4.5 (1.1-18.1)      |                |
| Total event counts                                         | 15               | ≤5                  |                |
| Total PY                                                   | 8552.01          | 442.87              |                |
| Mean follow-up PY                                          | 1.92             | 1.91                |                |
| Median follow-up PY                                        | 2.00             | 2.00                | 0.26           |
| <b><i>Incident AF</i></b>                                  |                  |                     |                |
| Rate in 1000 PY (95%CI)                                    | 41.6 (37.4-46.3) | 144.4 (110.3-189.0) |                |
| Total event counts                                         | 336              | 53                  |                |
| Total PY                                                   | 8072.02          | 367.13              |                |
| Mean follow-up PY                                          | 1.81             | 1.58                |                |
| Median follow-up PY                                        | 2.00             | 2.00                | <.0001         |
| <b><i>Death</i></b>                                        |                  |                     |                |
| Rate in 1000 PY (95%CI)                                    | 7.7 (6.1-9.8)    | 22.5 (12.1-41.8)    |                |
| Total event counts                                         | 66               | 10                  |                |
| Total PY                                                   | 8562.64          | 445.02              |                |
| Mean follow-up PY                                          | 1.92             | 1.92                |                |
| Median follow-up PY                                        | 2.00             | 2.00                | .006           |
| <b>5 YEAR RATE</b>                                         |                  |                     |                |
| <b><i>Ischemic Stroke</i></b>                              |                  |                     |                |
| Rate in 1000 PY (95%CI)                                    | 2.1 (1.5-2.9)    | 5.6 (2.3-13.5)      |                |
| Total event counts                                         | 36               | ≤5                  |                |
| Total PY                                                   | 17246.03         | 891.98              |                |
| Mean follow-up PY                                          | 3.87             | 3.84                |                |
| Median follow-up PY                                        | 4.54             | 4.65                | 0.08           |
| <b><i>Incident AF</i></b>                                  |                  |                     |                |
| Rate in 1000 PY (95%CI)                                    | 29.0 (26.5-31.8) | 106.5 (84.7-134.0)  |                |
| Total event counts                                         | 461              | 73                  |                |
| Total PY                                                   | 15901.77         | 685.37              |                |
| Mean follow-up PY                                          | 3.57             | 2.95                |                |
| Median follow-up PY                                        | 4.10             | 3.05                | <.0001         |

---

**Death**

|                         |                 |                  |             |
|-------------------------|-----------------|------------------|-------------|
| Rate in 1000 PY (95%CI) | 10.3 (8.9-12.0) | 17.8 (10.9-29.1) |             |
| Total event counts      | 179             | 16               |             |
| Total PY                | 17300.34        | 899.03           |             |
| Mean follow-up PY       | 3.88            | 3.88             |             |
| Median follow-up PY     | 4.56            | 4.75             | <b>0.05</b> |

---
